# Supplementary material
Source: PubMed Central journal article supplement (PMC3318924)
Supplement: NIHMS365331-supplement-Supporting_Information.pdf [file NIHMS365331-supplement-Supporting_Information.pdf]

## Electronic Supporting Information

# Spectroscopic and Computational Characterization of Cu<sup>II</sup>-OOR (R = H or Cumyl) Complexes Bearing a Me<sub>6</sub>-tren Ligand

Yu Jin Choi,<sup>a</sup> Kyung-Bin Cho,<sup>b</sup> Minoru Kubo,<sup>c</sup> Takashi Ogura,<sup>c</sup> Kenneth D. Karlin,<sup>b,d</sup>  
Jaeheung Cho,\*<sup>a</sup> and Wonwoo Nam\*<sup>a,b</sup>

<sup>a</sup> Department of Chemistry and Nano Science, Ewha Womans University, Seoul 120-750 Korea.

E-mail: [jaeheung@ewha.ac.kr](mailto:jaeheung@ewha.ac.kr); Fax: +82 2 3277 4441; Tel: +82 2 3277 4108

<sup>b</sup> Department of Bioinspired Science, Ewha Womans University, Seoul 120-750 Korea. E-mail:

[wwnam@ewha.ac.kr](mailto:wwnam@ewha.ac.kr)

<sup>c</sup> Picobiology Institute, Graduate School of Life Science, University of Hyogo, Hyogo 678-1297,  
Japan.

<sup>d</sup> Department of Chemistry, Johns Hopkins University, Baltimore, MD 21218, USA.

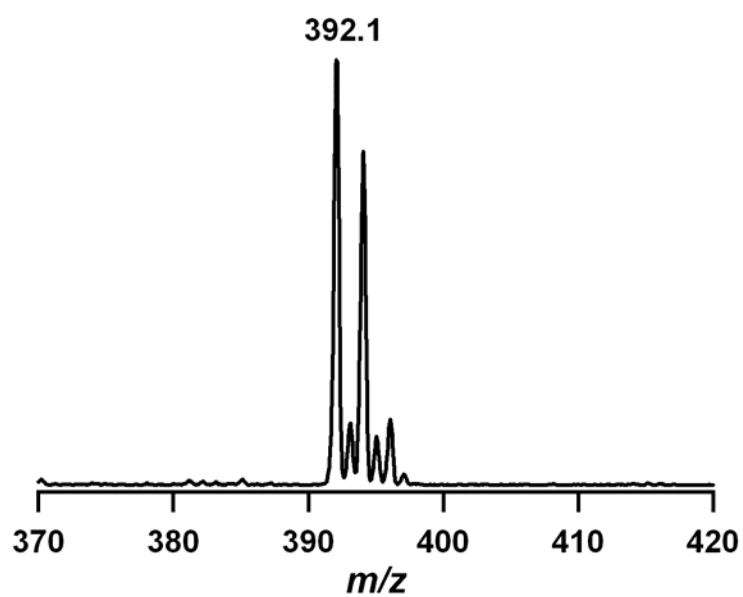

**Fig. S1** ESI-MS of **1** in CH<sub>3</sub>CN at room temperature.

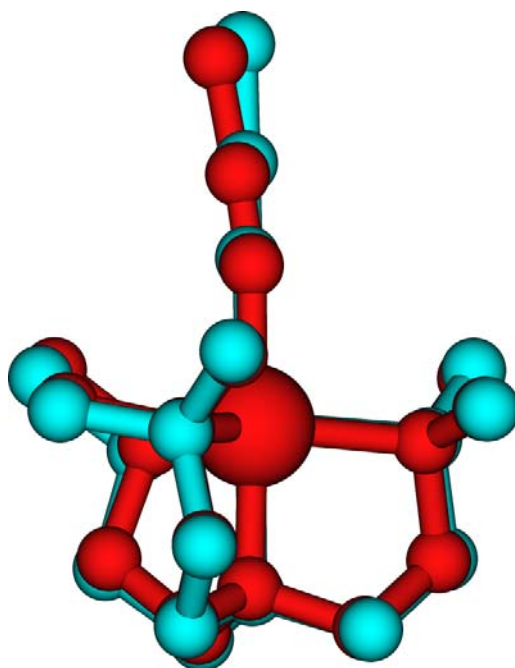

**Fig. S2** An overlay of the crystal (red) and calculated (green) structures. The calculated RMS deviation is 0.13 Å. Hydrogen atoms are omitted for clarity.

**Table S1.** Distances and angles (Å and °). The isomer **3a** is presented in the main text.

|           | Cu-L <sub>ax</sub> | Cu-N <sub>ax</sub> | Cu-N <sub>eq1</sub> | Cu-N <sub>eq2</sub> | Cu-N <sub>eq3</sub> | ∠ N <sub>ax</sub> -Cu-L <sub>ax</sub> | ∠ N <sub>eq</sub> -Cu-N <sub>eq</sub> <sup>a</sup> | O-O  | ∠ Cu-O-O |
|-----------|--------------------|--------------------|---------------------|---------------------|---------------------|---------------------------------------|----------------------------------------------------|------|----------|
| <b>1</b>  | 2.05               | 2.07               | 2.21                | 2.22                | 2.23                | 179.62                                | 119.61                                             | ---- | ----     |
| <b>2</b>  | 1.91               | 2.11               | 2.21                | 2.20                | 2.24                | 172.02                                | 121.02                                             | 1.52 | 109.62   |
| <b>3a</b> | 1.92               | 2.13               | 2.22                | 2.20                | 2.25                | 171.60                                | 120.86                                             | 1.52 | 109.25   |
| <b>3b</b> | 1.91               | 2.12               | 2.23                | 2.21                | 2.24                | 171.39                                | 120.86                                             | 1.52 | 110.97   |
| <b>3c</b> | 1.91               | 2.14               | 2.25                | 2.23                | 2.21                | 170.32                                | 120.07                                             | 1.51 | 109.41   |

<sup>a</sup> The largest of the three N<sub>eq</sub>-Cu-N<sub>eq</sub> angles.

**Table S2.** Mulliken spin density distribution and relative energies (kcal/mol). The isomer **3a** is presented in the main text.

| Complex   | Cu   | O <sub>inner</sub> | O <sub>outer</sub> | 4xN  | Rest | Rel. Energy |
|-----------|------|--------------------|--------------------|------|------|-------------|
| <b>1</b>  | 0.53 | ----               | ----               | 0.43 | 0.05 | ---         |
| <b>2</b>  | 0.51 | 0.25               | 0.00               | 0.24 | 0.00 | ---         |
| <b>3a</b> | 0.51 | 0.26               | -0.01              | 0.23 | 0.01 | 0.00        |
| <b>3b</b> | 0.51 | 0.26               | -0.01              | 0.23 | 0.01 | 0.04        |
| <b>3c</b> | 0.50 | 0.26               | 0.00               | 0.23 | 0.01 | -0.22       |



C 2.941934 1.083988 -0.005601  
C -2.890805 -0.184772 0.939702  
H -2.197358 -0.271155 3.509954  
H -0.431033 -0.297976 3.261158  
H -1.366298 1.104785 2.713757  
H -3.700966 -0.487037 1.620321  
H -2.892839 0.899985 0.823380  
H -3.064948 -0.644914 -0.034906  
H -1.464768 2.323471 -1.775585  
H -1.994985 1.533209 -3.297672  
H -2.602235 0.960890 -1.720922  
H 0.344141 1.189729 -3.901084  
H 0.843376 1.982429 -2.374739  
H 1.453468 0.362609 -2.783194  
H 2.540204 2.021002 0.376918  
H 3.993757 0.979510 0.299217  
H 2.886478 1.099958 -1.094694  
H 1.870452 0.860482 2.416451  
H 1.674110 -0.907538 2.429912  
H 3.303646 -0.201206 2.310244  
H 1.718538 -3.324921 -0.478564  
H 1.270885 -2.653453 1.087771  
H 3.453634 -1.729690 0.353117  
H 2.740578 -1.153225 -1.152354  
H -0.860998 -3.692085 0.158472  
H -1.917041 -2.473803 -0.551590  
H -2.276532 -2.577724 1.896309  
H -0.562979 -2.292950 2.198774  
H -0.215185 -2.973174 -2.337355  
H 1.077246 -1.777029 -2.384301  
H -0.884318 -0.982404 -3.687129  
H -1.927183 -1.150749 -2.275700  
O -0.423563 1.916129 0.701811  
O 0.195673 2.945235 -0.219102  
C 0.280224 4.287008 0.469412  
C 1.284713 4.228107 1.625678  
C 0.732056 5.172125 -0.703076  
C -1.128125 4.701526 0.917995  
C 2.606383 4.692274 1.480831  
C 3.517341 4.632586 2.543068  
C 3.126457 4.103635 3.776491  
C 1.816046 3.638087 3.939694  
C 0.906669 3.702380 2.877947  
H 2.935008 5.120758 0.541810  
H 4.525171 5.011746 2.406586  
H 3.826677 4.067739 4.604156  
H 1.499041 3.239546 4.899160  
H -0.105492 3.346496 3.026179  
H 0.878191 6.202490 -0.363396  
H 1.663493 4.814020 -1.148027  
H -0.038889 5.171942 -1.478321  
H -1.099757 5.695591 1.377277  
H -1.793090 4.738567 0.049760  
H -1.549150 3.995639 1.635910
